# Supplementary material for: Nuclear mRNA quality control in yeast is mediated by Nrd1 co-transcriptional recruitment, as revealed by the targeting of Rho-induced aberrant transcripts
Source: PubMed Central journal article supplement — Nucleic Acids Res. 2010 Nov 26;39(7):2809–20. doi: 10.1093/nar/gkq1192 (PMC3074134; doi:10.1093/nar/gkq1192), 2010-11-26
Supplement: supp_gkq1192_Supplementary_material.pdf [file supp_gkq1192_Supplementary_material.pdf]

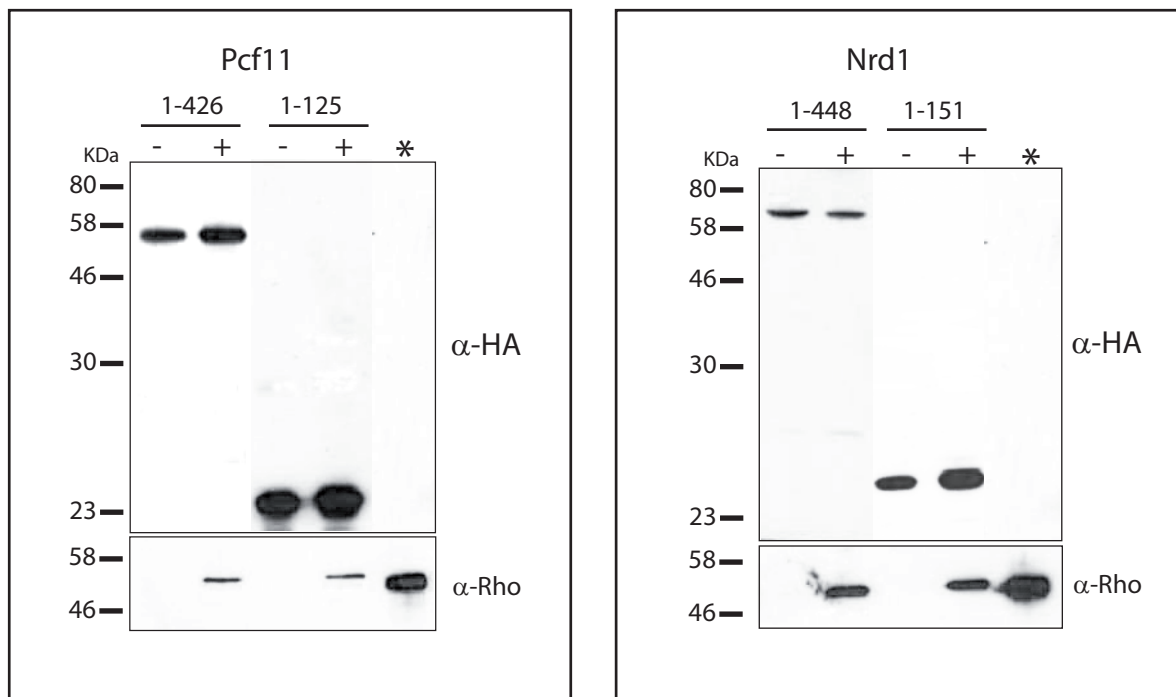

**Figure S1: Western blot analyses showing the level of expression of Rho and the overproduced protein fragments.** Cells harboring the Doxy-regulated Rho expression plasmid and a 2  $\mu$  construct expressing constitutively the indicated HA-tagged Pcf11 and Nrd1 protein-fragments (Pcf11: 1-426 and 1-125; Nrd1: 1-448 and 1-151) were grown under Rho-induced (+) or Rho-repressed (-) conditions. The proteins were extracted in lysis buffer, fractionated on a 10% polyacrylamide gel and analyzed by immunoblotting using anti-HA antibodies ( $\alpha$ -HA from Invitrogen) to detect the overproduced protein-fragments or custom made anti-Rho polyclonal antibodies ( $\alpha$ -Rho from Eurogentec) to detect Rho. The proteins were visualized with a secondary antibody using a chemiluminescence detection kit from Invitrogen. Purified bacterial Rho protein (lanes indicated by asterisks) run in parallel was used as control. Protein molecular weights, according to ColorPlus prestained protein marker (New England Biolabs) run in parallel, are shown on the left of the gels.

Figure S1

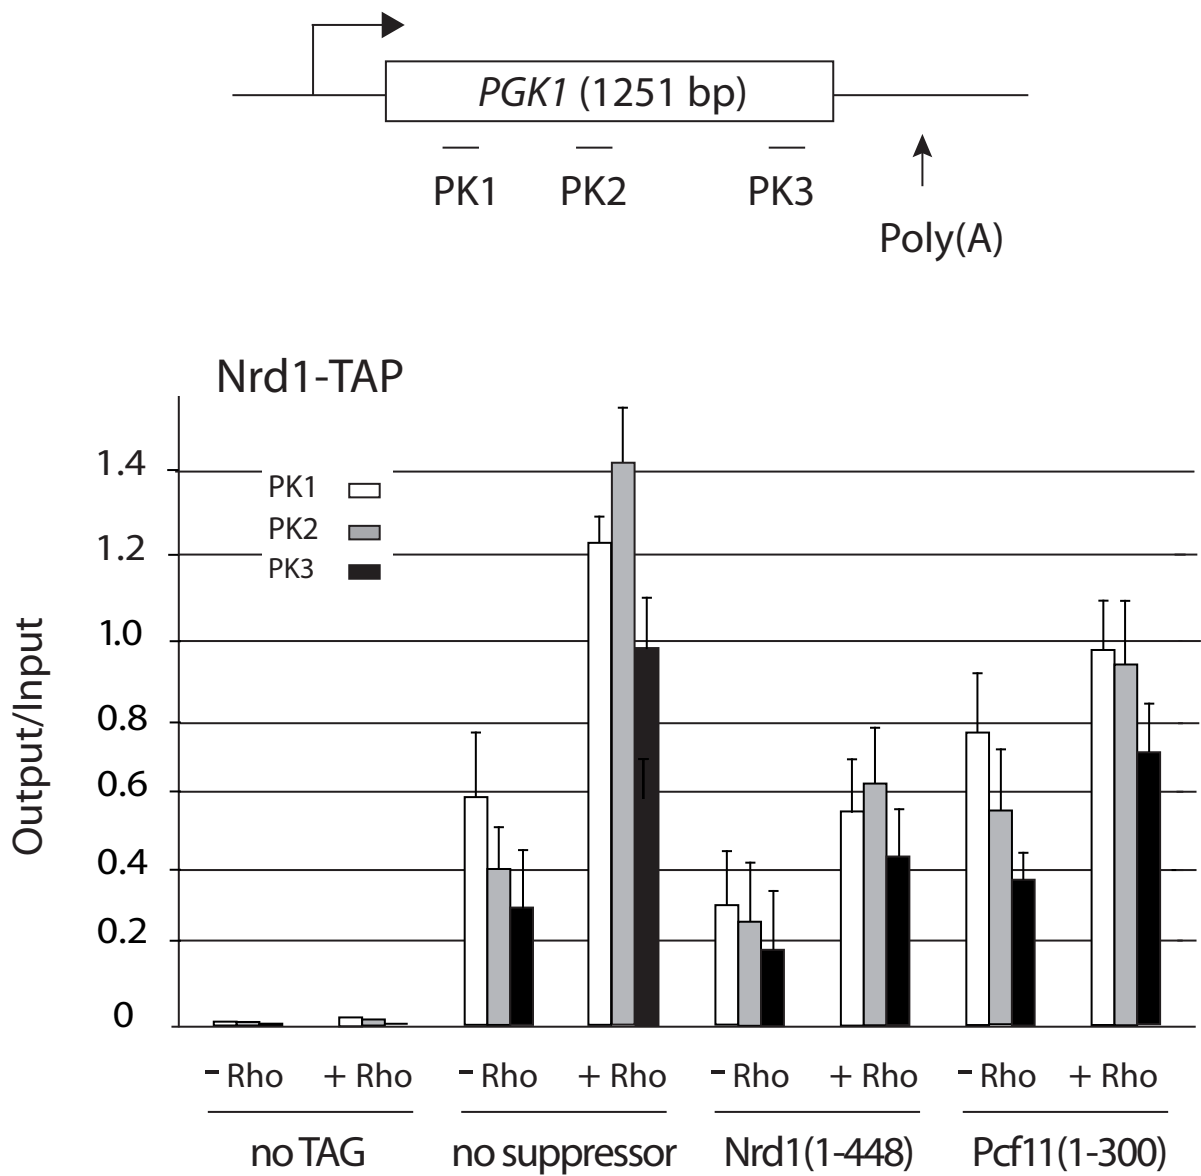

**Figure S2: ChIP analyses of Nrd1 recruitment across the *PGK1* locus**

**(Upper panel)** Schematic representation of the *PGK1* gene with the horizontal bars denoting the positions of the PCR products used in the ChIP analyses. **(Lower panel)** Quantifications of the fold enrichment for *PGK1* DNA in Nrd1-TAP immunoprecipitates from cells expressing Rho (+Rho) or not (- Rho) and co-transformed with either the empty 2 $\mu$  vector for the assays without suppressor or the plasmids over-expressing the suppressors Nrd1 (1-448) or Pcf11 (1-300). The « no TAG » control strain is W303 transformed with the empty 2 $\mu$  vector and either the (- Rho) or the (+Rho) plasmids. Immunoprecipitated samples (output) were normalized to input. The average of three independent experiments is shown with error bars representing standard deviations.

Figure S2

**Table S1** - *Saccharomyces cerevisiae* strains used in this study

| Strain name                         | Genotype                                                                                              | Source                        |
|-------------------------------------|-------------------------------------------------------------------------------------------------------|-------------------------------|
| BMA41                               | <i>MAT<math>\alpha</math> ade2-1 ura3-1 leu2-3,112 his3-11,15 trp1<math>\Delta</math> can1-100</i>    | Baudin-Baillieu et al., 1997* |
| W303                                | <i>MAT<math>\alpha</math> ade2-1 ura3-1 leu2-3,112 his3-11,15 trp1-1 can1-100</i>                     | Thomas and Rothstein, 1989**  |
| $\Delta rrp6$                       | as BMA41 with <i>rrp6<math>\Delta</math>::KAN</i>                                                     | Mosrin-Huaman et al., 2009    |
| DLY1144                             | as W303 with <i>nrd1<math>\Delta</math>::KAN [pRS415-NRD1-HA, LEU2, CEN/ARS]</i>                      | D. Libri laboratory           |
| DLY1146                             | as W303 with <i>nrd1<math>\Delta</math>::KAN [pRS415-nrd1-102-HA, LEU2, CEN/ARS]</i>                  | D. Libri laboratory           |
| NHY001                              | as W303 with <i>nrd1<math>\Delta</math>::KAN [pAG415-NRD1, LEU2, CEN/ARS]</i>                         | This study                    |
| YNH026                              | as W303 with <i>nrd1<math>\Delta</math>::KAN [pAG415-nrd1<math>\Delta</math>1-151, LEU2, CEN/ARS]</i> | This study                    |
| YPN102                              | as W303 with <i>nab3-11</i>                                                                           | P. Thuriaux laboratory        |
| DLY913                              | as W303 with <i>pcf11<math>\Delta</math>::TRP1 [pNOPL-PCF11, LEU2, CEN/ARS]</i>                       | D. Libri laboratory           |
| DLY915                              | as W303 with <i>pcf11<math>\Delta</math>::TRP1 [pNOPL-pcf11-13, LEU2, CEN/ARS]</i>                    | D. Libri laboratory           |
| DLY914                              | as W303 with <i>pcf11<math>\Delta</math>::TRP1 [pNOPL-pcf11-2, LEU2, CEN/ARS]</i>                     | D. Libri laboratory           |
| <i>rpo21-<math>\Delta</math>104</i> | as W303 with <i>rpo21-<math>\Delta</math>104</i>                                                      | P. Thuriaux laboratory        |
| DLY1124                             | as W303 with <i>NRD1-TAP::HIS3</i>                                                                    | D. Libri laboratory           |
| DLY388                              | as W303 with <i>RRP41-TAP::KAN</i>                                                                    | D. Libri laboratory           |
| DLY391                              | as W303 with <i>RRP4-TAP::HIS3</i>                                                                    | D. Libri laboratory           |
| DLY269                              | as W303 with <i>RRP6-TAP::HIS3</i>                                                                    | D. Libri laboratory           |

\*Baudin-Baillieu, A., Guillemet, E., Cullin, C., and Lacroute, F. (1997). Construction of a yeast strain deleted for the TRP1 promoter and coding region that enhances the efficiency of the polymerase chain reaction-disruption method. *Yeast* 13, 353-356.

\*\*Thomas, B.J., and Rothstein, R. (1989). The genetic control of direct-repeat recombination in *Saccharomyces*: the effect of rad52 and rad1 on mitotic recombination at GAL10, a transcriptionally regulated gene. *Genetics* 123, 725-738.

**Table S2** - Plasmids used in this study

| Plasmid name                         | Yeast sequences                                  | Rho expression                       | Backbone vector    | Source                     |
|--------------------------------------|--------------------------------------------------|--------------------------------------|--------------------|----------------------------|
| pCM185                               | <i>CEN TRP1</i>                                  |                                      |                    | Euroscarf                  |
| pCM189                               | <i>CEN URA3</i>                                  |                                      |                    | Euroscarf                  |
| pCM185-Rho                           | <i>CEN TRP1</i>                                  | <i>pTetO<sub>7</sub>::Rho-NLS</i>    | pCM185             | Mosrin-Huaman et al., 2009 |
| pCM189-Rho                           | <i>CEN URA3</i>                                  | <i>pTetO<sub>7</sub>::Rho-NLS</i>    | pCM189             | This study                 |
| pCM189-Rho-KE                        | <i>CEN URA3</i>                                  | <i>pTetO<sub>7</sub>::Rho-KE-NLS</i> | pCM189             | This study                 |
| pRS415- <i>NRD1</i> -HA              | <i>CEN LEU2 NRD1</i>                             |                                      | pRS415             | D.Libri laboratory         |
| pRS415- <i>nrd1-102</i> -HA          | <i>CEN LEU2 nrd1-102</i>                         |                                      | pRS415             | D.Libri laboratory         |
| pNOPL <sup>*</sup> - <i>PCF11</i>    | <i>CEN LEU2 PCF11</i>                            |                                      | pRS315-2XProtA-TEV | D.Libri laboratory         |
| pNOPL <sup>*</sup> - <i>pcf11-2</i>  | <i>CEN LEU2 pcf11-2</i>                          |                                      | pRS315-2XProtA-TEV | D.Libri laboratory         |
| pNOPL <sup>*</sup> - <i>pcf11-13</i> | <i>CEN LEU2 pcf11-13</i>                         |                                      | pRS315-2XProtA-TEV | D.Libri laboratory         |
| pAG425GPD                            | <i>2μ LEU2</i>                                   |                                      | pAG425GPD-ccdB     | Addgene                    |
| FL ( <i>PCF11</i> )                  | <i>2μ LEU2 PCF11</i>                             |                                      | pAG425GPD-ccdB     | Mosrin-Huaman et al., 2009 |
| 1-426                                | <i>2μ LEU2 pcf11 1-426</i>                       |                                      | pAG425GPD-ccdB     | This study                 |
| 1-300                                | <i>2μ LEU2 pcf11 1-300</i>                       |                                      | pAG425GPD-ccdB     | This study                 |
| 1-145                                | <i>2μ LEU2 pcf11 1-145</i>                       |                                      | pAG425GPD-ccdB     | This study                 |
| 1-125                                | <i>2μ LEU2 pcf11 1-125</i>                       |                                      | pAG425GPD-ccdB     | This study                 |
| ΔCID ( <i>PCF11</i> )                | <i>2μ LEU2 pcf11Δ1-125</i>                       |                                      | pAG425GPD-ccdB     | This study                 |
| M1                                   | <i>2μ LEU2 pcf11 1-145 M1 (A66D)</i>             |                                      | 1-145              | This study                 |
| M2                                   | <i>2μ LEU2 pcf11 1-145 M2 (D68A, S69A)</i>       |                                      | 1-145              | This study                 |
| M3                                   | <i>2μ LEU2 pcf11 1-145 M3 (D68A, S69A, I70A)</i> |                                      | 1-145              | This study                 |
| FL ( <i>NRD1</i> )                   | <i>2μ LEU2 NRD1</i>                              |                                      | pAG425GPD-ccdB     | This study                 |
| 1-151                                | <i>2μ LEU2 nrd1 1-151</i>                        |                                      | pAG425GPD-ccdB     | This study                 |
| 1-178                                | <i>2μ LEU2 nrd1 1-178</i>                        |                                      | pAG425GPD-ccdB     | This study                 |
| 1-369                                | <i>2μ LEU2 nrd1 1-369</i>                        |                                      | pAG425GPD-ccdB     | This study                 |
| 1-448                                | <i>2μ LEU2 nrd1 1-448</i>                        |                                      | pAG425GPD-ccdB     | This study                 |
| ΔRRM                                 | <i>2μ LEU2 nrd1Δ340-410</i>                      |                                      | pAG425GPD-ccdB     | This study                 |
| NRD1                                 | <i>CEN LEU2 NRD1</i>                             |                                      | pAG415GPD-ccdB     | This study                 |
| ΔCID ( <i>NRD1</i> )                 | <i>CEN LEU2 nrd1Δ1-151</i>                       |                                      | pAG415GPD-ccdB     | This study                 |

<sup>\*</sup>Senger, B., Simos, G., Bischoff, F.R., Podtelejnikov, A., Mann M., and Hurt, E. (1998). Mtr10p functions as a nuclear import receptor for the mRNA-binding protein Npl3p. EMBO J 17, 2196-2207.

**Table S3** – Primers used in this study for the construction of overexpression plasmids (full length, deleted, and mutated ORFs)

| ORF          | Plasmid name                     | Forward                                                                        | Reverse                                                                                   |
|--------------|----------------------------------|--------------------------------------------------------------------------------|-------------------------------------------------------------------------------------------|
| <i>PCF11</i> | 1-426                            |                                                                                | 5' GGGG <b>ACC</b> ACTTTGTACAAGAAAGCTGGGTCTATCATTACTAC<br>TTACCACACACGCTACATTTATTTG 3'    |
|              | 1-300                            | 5' GGGG <b>ACA</b> AGTTTGTACAAAAAGCAGGCTCCACCATGGA<br>TCACGACACAGAAGTTATAGT 3' | 5' GGGG <b>ACC</b> ACTTTGTACAAGAAAGCTGGGTCTATCATTACTAT<br>TCAACGCCAGAAATATTACCAAAAAGAG 3' |
|              | 1-145                            |                                                                                | 5' GGGG <b>ACC</b> ACTTTGTACAAGAAAGCTGGGTCTATCATTAGTTT<br>TTCTGGTGGAGACGA 3'              |
|              | 1-125                            |                                                                                | 5' GGGG <b>ACC</b> ACTTTGTACAAGAAAGCTGGGTCTATCATTACTA<br>GCCTTCAAACAGAGG 3'               |
|              | $\Delta$ CID<br>( <i>PCF11</i> ) | 5' GGGG <b>ACA</b> AGTTTGTACAAAAAGCAGGCTCCACCATGTC<br>AGCACTGGAGAAAATTG 3'     | 5' GGGG <b>ACC</b> ACTTTGTACAAGAAAGCTGGGTCTATCACTATTAT<br>TTTGTGACCAATTTTC 3'             |
|              | M1                               | 5' AAGCTATACGCTTTTTATGACTTGGACTCCATTTGTAAG 3'                                  | 5' CTTACAAATGGAGTCCAAGTCATAAAAAGCGTATAGCTT3'                                              |
|              | M2                               | 5' CGCTTTTTATGCCTTG <u>GCCGCC</u> ATTTGTAAGAATGTTGG 3'                         | 5' CCAACATTCTTACAAAT <u>GCCGCC</u> CAAGGCATAAAAAGCG 3'                                    |
|              | M3                               | 5' CGCTTTTTATGCCTTG <u>GCCGCC</u> GCTTGTAGAATGTTGG 3'                          | 5' CCAACATTCTTACA <u>GCCGCC</u> CAAGGCATAAAAAGCG 3'                                       |
| <i>NRD1</i>  | NRD1                             | 5' GGGG <b>ACA</b> AGTTTGTACAAAAAGCAGGCTCCACCATGCA<br>GCAGGACGACGATTTTC 3'     | 5' GGGG <b>ACC</b> ACTTTGTACAAGAAAGCTGGGTCTAGCAAATAAA<br>GGGTGGAGTAAAG 3'                 |
|              | $\Delta$ CID<br>( <i>NRD1</i> )  | 5' GGGG <b>ACA</b> AGTTTGTACAAAAAGCAGGCTCCACCATGGA<br>CATATCGAATAACACC 3'      |                                                                                           |
|              | 1-151                            | As <i>NRD1</i> plasmid                                                         | 5' GGGG <b>ACC</b> ACTTTGTACAAGAAAGCTGGGTCTATTATCAAGC<br>AAAGCATTTTGACCTGATGGCG 3'        |
|              | 1-178                            |                                                                                | 5' GGGG <b>ACC</b> ACTTTGTACAAGAAAGCTGGGTCTATCATTACAA<br>GATTTGTTTCGACCTCTGCTTGGG 3'      |
|              | 1-369                            |                                                                                | 5' GGGG <b>ACC</b> ACTTTGTACAAGAAAGCTGGGTCTATCATTAAATG<br>ACGCTTTGACTTCAGCAAAAGG 3'       |
|              | 1-448                            |                                                                                | 5' GGGG <b>ACC</b> ACTTTGTACAAGAAAGCTGGGTCTATCATTAAACCA<br>GAAGTGCCACCCCATTTGCGC 3'       |
|              | $\Delta$ RRM                     | 5'-<br>GGTCCAAGAGATTGTTGTGACTATCAACACGGTTACAGTATT<br>ATTCCTATGCACAGGC 3'       | 5' GATAGTCACAACAATCTCTTGGACCACGGCTGTAGACTTTAATA<br>TATCTGGTGG 3'                          |

Bold sequences correspond to the Gateway attB-attachment sites and the stop codons whenever necessary. Italics and underlined sequences represent the linker nucleotides and the modified codons, respectively.

**Table S4** - Oligonucleotides and amplicons used in the Northern blot analyses

| <b>Targets</b> | <b>Amplicons, bp</b> | <b>Oligonucleotide sequence</b> |                               |
|----------------|----------------------|---------------------------------|-------------------------------|
| <i>PGK1</i>    | NA                   | 5' CCTTACCGAAGTACTTCAATTCC 3'   |                               |
| 18S            | NA                   | 5' GGTTAAGGTCTCGTT 3'           |                               |
| 5.8S           | NA                   | 5' TTTCGCTGCGTTCTTCATC 3'       |                               |
|                |                      | <b>Forward</b>                  | <b>Reverse</b>                |
| <i>PMA1</i>    | 631                  | 5' GATGGTCGTATTGTCACTGAAGAC 3'  | 5' CAATAGCATCCAAACCCTTCTTC 3' |

NA, not applicable

**Table S5** – PMA1 and PGK1 primers used in the ChIP experiments

| <b>Alias</b> | <b>Name</b> | <b>Sequence</b>                       |
|--------------|-------------|---------------------------------------|
| PM1          | F-151       | 5' CAATCTAATCACGGTGTCTGACGACGAAGAC 3' |
|              | R-390       | 5' GGCTTCCATAACGAATTGAATTGGACCGAC 3'  |
| PM2          | F-1010      | 5' GTTTGCCAGCTGTCGTTACCACCAC 3'       |
|              | R-1235      | 5' GCAGCCAAACAAGCAGTCAACATCAAG 3'     |
| PM3          | F-2251      | 5' AACCTACCAAGATTATGGGGTATGTC 3'      |
|              | R-2532      | 5' CCAACCGAATAAGGTAAACATGGTAGCGATG 3' |
| PK1          | F-455       | 5' GGCTGATGTTTACATCAACGATGCCT 3'      |
|              | R-650       | 5' TCAGCAACCTTGGCACCACCTAAG 3'        |
| PK2          | F-751       | 5' ATCGGTGACTCCATCTTCGACAAGGC 3'      |
|              | R-927       | 5' CCAGCCAGCTGGAATACCTTCCTTGTC 3'     |
| PK3          | F-1053      | 5' GGCTTTGTTAGACGAAGTTGTCAAGAGC 3'    |
|              | R-1229      | 5' GCAACACCTGGCAATTCCTTACCTTCC 3'     |
